# Supplementary material for: Maternal Supplementation with N-Acetylcysteine Modulates the Microbiota-Gut-Brain Axis in Offspring of the Poly I:C Rat Model of Schizophrenia
Source: MDPI journal article supplement (doi:10.3390/antiox12040970), 2023-04-20
Supplement: s1 [file s1]

**Supplementary Figure S1. Nested bar plot showing gut microbiota composition at the family level in all study groups.**  
Individual gut microbiota composition data for each animal in each study group at the family level. The compositions at family level was relatively homogeneous between animals in each group.

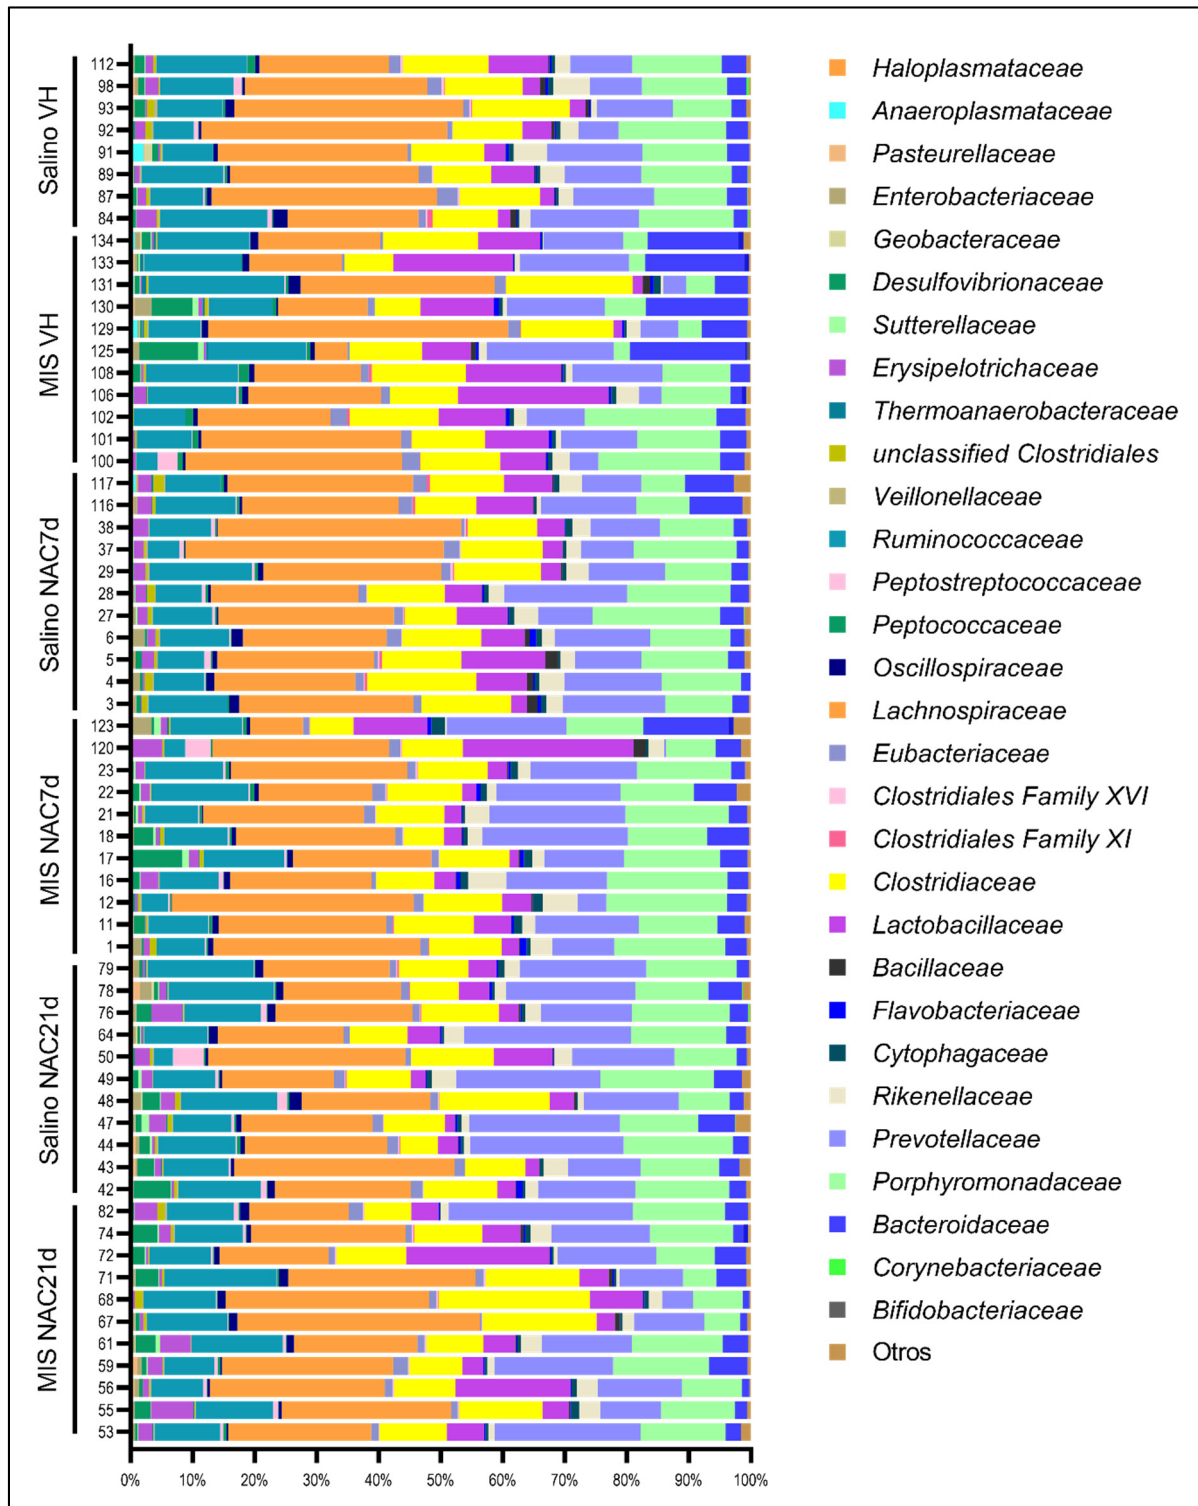

**Supplementary Table S1. Data from phyla populations.** Table shows the mean  $\pm$  SEM for each group and the p value as result of the Kruskal-Wallis (KW) analysis (\*p < 0.05).  $\eta^2$ : size effect. *Firmicutes* showed an interesting interaction with a reduction of bacterias in saline-offspring treated with NAC21 while the opposite pattern was found in MIS-treated animals. An effect of NAC on *Deferribacteres* was found with an increase of bacteria in both groups treated with NAC for 21 days.

| Phylum                 | Sal VH |       | MIS VH |       | Sal NAC7d |       | MIS NAC7d |       | Sal NAC21d |       | MIS NAC21d |       | KW<br>(p-value) | $\eta^2$     |
|------------------------|--------|-------|--------|-------|-----------|-------|-----------|-------|------------|-------|------------|-------|-----------------|--------------|
|                        | Mean   | SEM   | Mean   | SEM   | Mean      | SEM   | Mean      | SEM   | Mean       | SEM   | Mean       | SEM   |                 |              |
| <i>Actinobacteria</i>  | 0.112  | 0.049 | 0.126  | 0.055 | 0.072     | 0.028 | 0.099     | 0.072 | 0.086      | 0.034 | 0.036      | 0.018 | 0.744           | 0.044        |
| <i>O.Bacteroidetes</i> | 32.980 | 1.505 | 31.640 | 2.700 | 33.560    | 1.287 | 39.310    | 2.841 | 40.030     | 2.318 | 32.530     | 3.106 | <b>0.052</b>    | <b>0.175</b> |
| <i>Firmicutes</i>      | 64.870 | 1.673 | 64.880 | 3.574 | 64.600    | 1.307 | 57.440    | 3.174 | 56.110     | 2.258 | 64.670     | 3.153 | <b>0.031*</b>   | <b>0.198</b> |
| <i>Proteobacteria</i>  | 1.623  | 0.288 | 2.933  | 1.273 | 1.383     | 0.247 | 2.664     | 0.792 | 3.510      | 0.515 | 2.557      | 0.480 | 0.057           | 0.171        |
| <i>Cyanobacteria</i>   | 0.050  | 0.003 | 0.000  | 0.000 | 0.002     | 0.002 | 0.003     | 0.003 | 0.018      | 0.010 | 0.007      | 0.004 | 0.343           | 0.064        |
| <i>Deferribacteres</i> | 0.000  | 0.000 | 0.000  | 0.000 | 0.000     | 0.000 | 0.000     | 0.000 | 0.040      | 0.030 | 0.085      | 0.047 | <b>0.033*</b>   | 0.196        |
| <i>Tenericutes</i>     | 0.337  | 0.266 | 0.378  | 0.132 | 0.357     | 0.228 | 0.464     | 0.214 | 0.133      | 0.046 | 0.112      | 0.094 | 0.092           | 0.163        |
| Unclassified Bacteria  | 0.069  | 0.055 | 0.004  | 0.004 | 0.006     | 0.006 | 0.006     | 0.006 | 0.044      | 0.039 | 0.000      | 0.000 | 0.791           | 0.016        |
| <i>Verrumicrobia</i>   | 0.000  | 0.000 | 0.027  | 0.018 | 0.010     | 0.008 | 0.005     | 0.004 | 0.010      | 0.005 | 0.012      | 0.009 | 0.708           | 0.040        |

**Supplementary Table S2. Data from family populations.** Table shows the mean  $\pm$  SEM for each group and the p value as result of the Kruskal-Wallis analysis (\*p < 0.05).  $\eta^2$ : size effect.

| Family                         | Sal VH |      | MIS VH |      | Sal NAC7d |      | MIS NAC7d |      | Sal NAC21d |      | MIS NAC21d |        | KW (p value)        | $\eta^2$     |
|--------------------------------|--------|------|--------|------|-----------|------|-----------|------|------------|------|------------|--------|---------------------|--------------|
|                                | Mean   | SEM  | Mean   | SEM  | Mean      | SEM  | Mean      | SEM  | Mean       | SEM  | Mean       | SEM    |                     |              |
| <i>Haloplasmataceae</i>        | 0.07   | 0.06 | 0.00   | 0.00 | 0.01      | 0.01 | 0.01      | 0.01 | 0.04       | 0.04 | <0.001     | <0.001 | 0.79                | 0.016        |
| <i>Anaeroplasmataceae</i>      | 0.27   | 0.27 | 0.28   | 0.11 | 0.13      | 0.08 | 0.07      | 0.02 | 0.08       | 0.03 | 0.01       | 0.01   | 0.06                | 0.147        |
| <i>Pasteurellaceae</i>         | 0.19   | 0.07 | 0.09   | 0.04 | 0.18      | 0.04 | 0.14      | 0.03 | 0.38       | 0.09 | 0.29       | 0.10   | 0.033**             | 0.226        |
| <i>Enterobacteriaceae</i>      | 0.19   | 0.07 | 0.51   | 0.24 | 0.59      | 0.19 | 0.50      | 0.28 | 0.64       | 0.17 | 0.35       | 0.06   | 0.12                | 0.132        |
| <i>Geobacteraceae</i>          | 0.19   | 0.15 | 0.06   | 0.03 | 0.02      | 0.01 | 0.04      | 0.04 | 0.11       | 0.04 | 0.07       | 0.02   | 0.36                | 0.083        |
| <i>Desulfovibrionaceae</i>     | 0.90   | 0.20 | 1.92   | 0.94 | 0.29      | 0.10 | 1.55      | 0.71 | 1.76       | 0.51 | 1.68       | 0.44   | <u>0.018*</u>       | <u>0.218</u> |
| <i>Sutterellaceae</i>          | 0.08   | 0.03 | 0.25   | 0.11 | 0.05      | 0.02 | 0.32      | 0.12 | 0.23       | 0.11 | 0.14       | 0.06   | 0.43                | 0.090        |
| <i>Veillonellaceae</i>         | 0.24   | 0.05 | 0.08   | 0.02 | 0.22      | 0.03 | 0.12      | 0.02 | 0.16       | 0.02 | 0.15       | 0.03   | <u>0.004**</u>      | <u>0.304</u> |
| <i>Erysipelotrichaceae</i>     | 1.36   | 0.36 | 0.43   | 0.16 | 1.57      | 0.23 | 1.45      | 0.41 | 1.63       | 0.43 | 2.24       | 0.64   | <u>0.014*</u>       | <u>0.216</u> |
| <i>Thermoanaerobacteraceae</i> | 0.01   | 0.01 | 0.25   | 0.07 | 0.06      | 0.03 | 0.06      | 0.03 | 0.08       | 0.03 | 0.04       | 0.02   | 0.08                | 0.159        |
| Unclassified Clostridiales     | 0.46   | 0.14 | 0.21   | 0.06 | 0.70      | 0.16 | 0.36      | 0.10 | 0.30       | 0.09 | 0.39       | 0.13   | 0.14                | 0.120        |
| <i>Ruminococcaceae</i>         | 11.32  | 1.28 | 12.43  | 1.53 | 9.98      | 0.96 | 9.62      | 1.09 | 11.90      | 1.20 | 11.69      | 0.87   | 0.44                | 0.089        |
| <i>Peptostreptococcaceae</i>   | 0.44   | 0.16 | 0.38   | 0.29 | 0.43      | 0.10 | 0.67      | 0.35 | 0.94       | 0.43 | 0.46       | 0.07   | 0.05                | 0.194        |
| <i>Peptococcaceae</i>          | 0.33   | 0.13 | 0.66   | 0.15 | 0.29      | 0.04 | 0.37      | 0.06 | 0.24       | 0.04 | 0.21       | 0.04   | 0.07                | 0.215        |
| <i>Oscillospiraceae</i>        | 0.90   | 0.23 | 0.90   | 0.14 | 0.76      | 0.18 | 0.57      | 0.11 | 1.00       | 0.15 | 0.89       | 0.15   | 0.41                | 0.079        |
| <i>Lachnospiraceae</i>         | 30.66  | 2.46 | 23.74  | 3.61 | 28.74     | 1.89 | 25.44     | 2.38 | 23.08      | 1.65 | 26.05      | 2.05   | 0.12                | 0.179        |
| <i>Eubacteriaceae</i>          | 1.64   | 0.32 | 1.43   | 0.26 | 1.57      | 0.21 | 1.34      | 0.12 | 1.39       | 0.11 | 1.28       | 0.18   | 0.86                | 0.029        |
| Clostridiales Family XVI       | 0.24   | 0.05 | 0.00   | 0.00 | 0.16      | 0.03 | 0.12      | 0.03 | 0.09       | 0.02 | 0.23       | 0.03   | <u>&lt;0.001***</u> | <u>0.378</u> |
| Clostridiales Family XI        | 0.15   | 0.10 | 0.12   | 0.06 | 0.21      | 0.06 | 0.08      | 0.03 | 0.10       | 0.03 | 0.04       | 0.02   | 0.60                | 0.058        |
| <i>Clostridiaceae</i>          | 12.25  | 0.71 | 12.98  | 1.11 | 12.60     | 0.73 | 10.49     | 0.64 | 10.90      | 0.93 | 12.67      | 1.51   | 0.27                | 0.112        |
| <i>Lactobacillaceae</i>        | 4.26   | 0.95 | 10.90  | 2.06 | 6.67      | 0.99 | 6.26      | 2.29 | 3.97       | 0.65 | 7.92       | 2.00   | <u>0.029*</u>       | <u>0.243</u> |
| <i>Bacillaceae</i>             | 0.44   | 0.13 | 0.22   | 0.12 | 0.57      | 0.21 | 0.28      | 0.18 | 0.11       | 0.02 | 0.24       | 0.08   | 0.12                | 0.127        |
| <i>Flavobacteriaceae</i>       | 0.32   | 0.04 | 0.43   | 0.06 | 0.24      | 0.10 | 0.45      | 0.10 | 0.29       | 0.09 | 0.18       | 0.02   | <u>0.026*</u>       | <u>0.208</u> |
| <i>Cytophagaceae</i>           | 0.51   | 0.09 | 0.51   | 0.11 | 0.73      | 0.07 | 1.09      | 0.16 | 0.51       | 0.08 | 0.58       | 0.10   | <u>0.014*</u>       | <u>0.229</u> |
| <i>Rikenellaceae</i>           | 3.22   | 0.61 | 1.45   | 0.33 | 2.78      | 0.29 | 2.92      | 0.53 | 2.37       | 0.32 | 2.03       | 0.36   | 0.06                | 0.157        |
| <i>Prevotellaceae</i>          | 11.90  | 1.27 | 10.99  | 1.78 | 13.07     | 1.11 | 14.76     | 2.19 | 19.48      | 1.50 | 15.31      | 2.07   | <u>0.022*</u>       | <u>0.217</u> |
| <i>Porphyromonadaceae</i>      | 13.76  | 0.84 | 9.11   | 2.02 | 12.97     | 1.17 | 14.70     | 1.08 | 13.83      | 0.93 | 11.11      | 1.10   | 0.09                | 0.135        |
| <i>Bacteroidaceae</i>          | 3.09   | 0.22 | 8.99   | 1.93 | 3.56      | 0.72 | 5.13      | 1.04 | 3.30       | 0.42 | 3.12       | 0.53   | <u>0.009**</u>      | <u>0.251</u> |
| <i>Corynebacteriaceae</i>      | 0.10   | 0.05 | 0.00   | 0.00 | 0.03      | 0.02 | 0.00      | 0.00 | 0.04       | 0.03 | 0.00       | 0.00   | <u>0.006**</u>      | <u>0.298</u> |
| <i>Bifidobacteriaceae</i>      | 0.00   | 0.00 | 0.07   | 0.05 | 0.00      | 0.00 | 0.00      | 0.00 | 0.00       | 0.00 | 0.00       | 0.00   | <u>0.004**</u>      | <u>0.243</u> |

**Supplementary Table S3. Genus and species proportions.** This table shows the percentage (%) of different members of genus and species in each group.  $\eta^2$ : size effect. Data are shown as mean  $\pm$  SEM. In the KW column, results from the Kruskal-Wallis analysis are shown [ $*p < 0.05$ .  $**p < 0.01$ .  $***p < 0.001$ ].

| Genus/Specie                      | Sal VH |      | MIS VH |      | Sal NAC7d |      | MIS NAC7d |      | Sal NAC21d |      | MIS NAC21d |      | KW (p value)        | $\eta^2$     |
|-----------------------------------|--------|------|--------|------|-----------|------|-----------|------|------------|------|------------|------|---------------------|--------------|
|                                   | Mean   | SEM  | Mean   | SEM  | Mean      | SEM  | Mean      | SEM  | Mean       | SEM  | Mean       | SEM  |                     |              |
| <i>Bifidobacterium animalis</i>   | 0.00   | 0.00 | 0.05   | 0.05 | 0.00      | 0.00 | 0.00      | 0.00 | 0.00       | 0.00 | 0.00       | 0.00 | 0.09                | 0.243        |
| <i>Corynebacterium stationis</i>  | 0.10   | 0.05 | 0.00   | 0.00 | 0.03      | 0.01 | 0.00      | 0.00 | 0.05       | 0.03 | 0.00       | 0.00 | <b>0.009**</b>      | <b>0.298</b> |
| <b>Bacteroides (gen.)</b>         | 0.59   | 0.18 | 5.39   | 1.94 | 1.35      | 0.43 | 2.02      | 0.71 | 0.85       | 0.28 | 1.25       | 0.41 | 0.67                | 0.042        |
| <i>Bacteroides acidifaciens</i>   | 0.00   | 0.00 | 0.09   | 0.04 | 0.03      | 0.02 | 0.00      | 0.00 | 0.01       | 0.01 | 0.00       | 0.00 | <b>0.038*</b>       | <b>0.280</b> |
| <i>Bacteroides dorei</i>          | 0.59   | 0.18 | 3.26   | 1.48 | 0.97      | 0.31 | 1.40      | 0.40 | 0.84       | 0.28 | 1.13       | 0.41 | 0.93                | 0.027        |
| <i>Bacteroides vulgatus</i>       | 0.00   | 0.00 | 0.26   | 0.15 | 0.14      | 0.07 | 0.32      | 0.30 | 0.00       | 0.00 | 0.08       | 0.04 | 0.07                | 0.207        |
| <i>Bacteroides uniformis</i>      | 0.00   | 0.00 | 1.50   | 0.76 | 0.08      | 0.06 | 0.18      | 0.13 | 0.00       | 0.00 | 0.03       | 0.01 | <b>0.014*</b>       | <b>0.263</b> |
| <i>Parabacteroides distasonis</i> | 0.01   | 0.01 | 0.12   | 0.07 | 0.06      | 0.02 | 0.02      | 0.01 | 0.00       | 0.00 | 0.00       | 0.00 | <b>0.026*</b>       | <b>0.205</b> |
| <b>Prevotella (gen.)</b>          | 2.61   | 0.63 | 2.45   | 0.54 | 2.66      | 0.53 | 3.52      | 0.84 | 4.47       | 0.73 | 3.03       | 0.48 | 0.25                | 0.115        |
| <b>Alistipes (gen.)</b>           | 1.14   | 0.42 | 0.83   | 0.23 | 0.69      | 0.29 | 0.63      | 0.24 | 1.00       | 0.25 | 0.38       | 0.16 | 0.19                | 0.124        |
| <b>Lactobacillus (gen.)</b>       | 4.00   | 0.94 | 10.79  | 2.05 | 6.61      | 1.01 | 6.10      | 2.27 | 3.59       | 0.64 | 7.70       | 2.00 | <b>0.017*</b>       | <b>0.261</b> |
| <i>Lactobacillus hominis</i>      | 0.03   | 0.03 | 0.05   | 0.03 | 0.19      | 0.09 | 0.09      | 0.03 | 0.15       | 0.10 | 0.04       | 0.02 | 0.20                | 0.112        |
| <i>Lactobacillus intestinalis</i> | 0.01   | 0.01 | 0.14   | 0.04 | 0.56      | 0.14 | 0.62      | 0.25 | 0.24       | 0.08 | 0.27       | 0.11 | <b>0.003**</b>      | <b>0.350</b> |
| <i>Lactobacillus animalis</i>     | 0.01   | 0.01 | 0.14   | 0.04 | 0.09      | 0.04 | 0.08      | 0.04 | 0.01       | 0.01 | 0.22       | 0.09 | <b>0.023*</b>       | <b>0.207</b> |
| <i>Lactobacillus johnsonii</i>    | 0.81   | 0.21 | 1.24   | 0.36 | 0.51      | 0.12 | 0.42      | 0.24 | 0.48       | 0.09 | 0.51       | 0.10 | 0.07                | 0.199        |
| <i>Lactobacillus kitasatonis</i>  | 0.00   | 0.00 | 0.13   | 0.06 | 0.00      | 0.00 | 0.01      | 0.01 | 0.00       | 0.00 | 0.00       | 0.00 | <b>0.007**</b>      | <b>0.174</b> |
| <i>Lactobacillus murinus</i>      | 0.35   | 0.13 | 1.08   | 0.28 | 0.81      | 0.22 | 0.75      | 0.25 | 0.37       | 0.10 | 1.13       | 0.46 | 0.22                | 0.128        |
| <i>Lactobacillus reuteri</i>      | 0.11   | 0.07 | 0.26   | 0.09 | 0.18      | 0.03 | 0.15      | 0.09 | 0.10       | 0.04 | 0.14       | 0.02 | 0.06                | 0.196        |
| <i>Lactobacillus vaginalis</i>    | 0.31   | 0.11 | 0.56   | 0.24 | 0.55      | 0.08 | 0.51      | 0.32 | 0.31       | 0.07 | 0.37       | 0.06 | 0.10                | 0.155        |
| <i>Candidatus arthromitus</i>     | 0.04   | 0.04 | 0.01   | 0.01 | 0.09      | 0.04 | 0.04      | 0.02 | 0.15       | 0.10 | 0.08       | 0.05 | 0.19                | 0.178        |
| <b>Clostridium (gen.)</b>         | 7.50   | 0.56 | 7.91   | 0.76 | 7.40      | 0.61 | 6.35      | 0.37 | 6.81       | 0.88 | 8.24       | 1.07 | 0.42                | 0.084        |
| <i>Clostridium hiranonis</i>      | 0.05   | 0.03 | 0.02   | 0.01 | 0.05      | 0.02 | 0.07      | 0.03 | 0.11       | 0.05 | 0.08       | 0.03 | 0.30                | 0.203        |
| <i>Clostridium sp.</i>            | 2.39   | 0.25 | 2.23   | 0.36 | 2.36      | 0.26 | 1.84      | 0.17 | 1.68       | 0.27 | 2.77       | 0.51 | 0.16                | 0.120        |
| <i>Clostridium vincentii</i>      | 0.05   | 0.02 | 0.03   | 0.03 | 0.02      | 0.01 | 0.15      | 0.04 | 0.33       | 0.11 | 0.14       | 0.04 | <b>&lt;0.001***</b> | <b>0.326</b> |
| <b>Eubacterium (gen.)</b>         | 0.10   | 0.04 | 0.10   | 0.05 | 0.28      | 0.12 | 0.15      | 0.10 | 0.15       | 0.03 | 0.10       | 0.03 | 0.63                | 0.073        |
| <b>Acetatifactor (gen.)</b>       | 0.14   | 0.03 | 0.03   | 0.01 | 0.12      | 0.03 | 0.17      | 0.04 | 0.18       | 0.05 | 0.15       | 0.04 | <b>0.043*</b>       | <b>0.182</b> |
| <b>Coprococcus (gen.)</b>         | 1.01   | 0.44 | 0.35   | 0.15 | 0.66      | 0.35 | 0.59      | 0.26 | 0.40       | 0.13 | 0.28       | 0.16 | 0.61                | 0.044        |
| <i>Eubacterium hadrum</i>         | 0.34   | 0.30 | 0.02   | 0.01 | 0.01      | 0.01 | 0.09      | 0.05 | 0.26       | 0.13 | 0.02       | 0.01 | 0.14                | 0.180        |
| <b>Lachnoanaerobaculum (gen.)</b> | 0.44   | 0.17 | 0.05   | 0.03 | 0.35      | 0.09 | 0.44      | 0.10 | 0.24       | 0.07 | 0.28       | 0.10 | <b>0.030*</b>       | <b>0.232</b> |
| <b>Lachnoclostridium (gen.)</b>   | 0.25   | 0.09 | 0.19   | 0.07 | 0.20      | 0.07 | 0.19      | 0.06 | 0.09       | 0.04 | 0.21       | 0.06 | 0.66                | 0.022        |
| <b>Roseburia (gen.)</b>           | 0.31   | 0.16 | 0.05   | 0.05 | 0.23      | 0.07 | 0.26      | 0.12 | 0.38       | 0.13 | 0.83       | 0.29 | <b>0.001**</b>      | <b>0.372</b> |
| <b>Ruminococcus (gen.)</b>        | 4.61   | 0.78 | 4.99   | 0.89 | 5.44      | 0.56 | 4.31      | 0.70 | 3.41       | 0.47 | 4.23       | 0.64 | 0.25                | 0.176        |
| <b>Oscillibacter (gen.)</b>       | 0.11   | 0.05 | 0.12   | 0.03 | 0.05      | 0.02 | 0.05      | 0.02 | 0.13       | 0.02 | 0.11       | 0.03 | 0.11                | 0.153        |

|                                                   |      |      |      |      |      |      |      |      |      |      |      |      |                |              |
|---------------------------------------------------|------|------|------|------|------|------|------|------|------|------|------|------|----------------|--------------|
| <b><i>Faecalibacterium</i></b><br><b>(gen.)</b>   | 5.19 | 0.93 | 7.30 | 1.10 | 3.87 | 0.47 | 4.23 | 0.63 | 5.47 | 0.60 | 5.98 | 0.72 | 0.05           | 0.201        |
| <b><i>Ruminiclostridium</i></b><br><b>(gen.)</b>  | 0.09 | 0.01 | 0.04 | 0.02 | 0.07 | 0.01 | 0.06 | 0.02 | 0.07 | 0.02 | 0.05 | 0.02 | 0.24           | 0.137        |
| <b><i>Turicibacter</i> (gen.)</b>                 | 0.55 | 0.20 | 0.18 | 0.11 | 0.65 | 0.12 | 0.58 | 0.20 | 0.60 | 0.23 | 1.27 | 0.46 | <b>0.023*</b>  | <b>0.228</b> |
| <i>Parasutterella</i><br><i>excrementihominis</i> | 0.09 | 0.03 | 0.25 | 0.11 | 0.05 | 0.02 | 0.31 | 0.12 | 0.23 | 0.11 | 0.15 | 0.06 | 0.52           | 0.090        |
| <i>Bilophila</i><br><i>Wadsworthia</i>            | 0.73 | 0.20 | 1.89 | 0.95 | 0.05 | 0.02 | 0.77 | 0.43 | 0.38 | 0.16 | 0.70 | 0.38 | <b>0.009**</b> | <b>0.241</b> |
| <b><i>Desulfovibrio</i></b><br><b>(gen.)</b>      | 0.11 | 0.05 | 0.00 | 0.00 | 0.15 | 0.08 | 0.01 | 0.01 | 0.45 | 0.22 | 0.15 | 0.05 | <b>0.014*</b>  | <b>0.259</b> |
